# Supplementary material for: Identifying novel selective PPO inhibitors through structure-based virtual screening and bio-evaluation
Source: Royal Society of Chemistry journal article supplement (doi:10.1039/d2ra08006k), 2023-01-01
Supplement: d2ra08006k1.pdf [file d2ra08006k1.pdf]

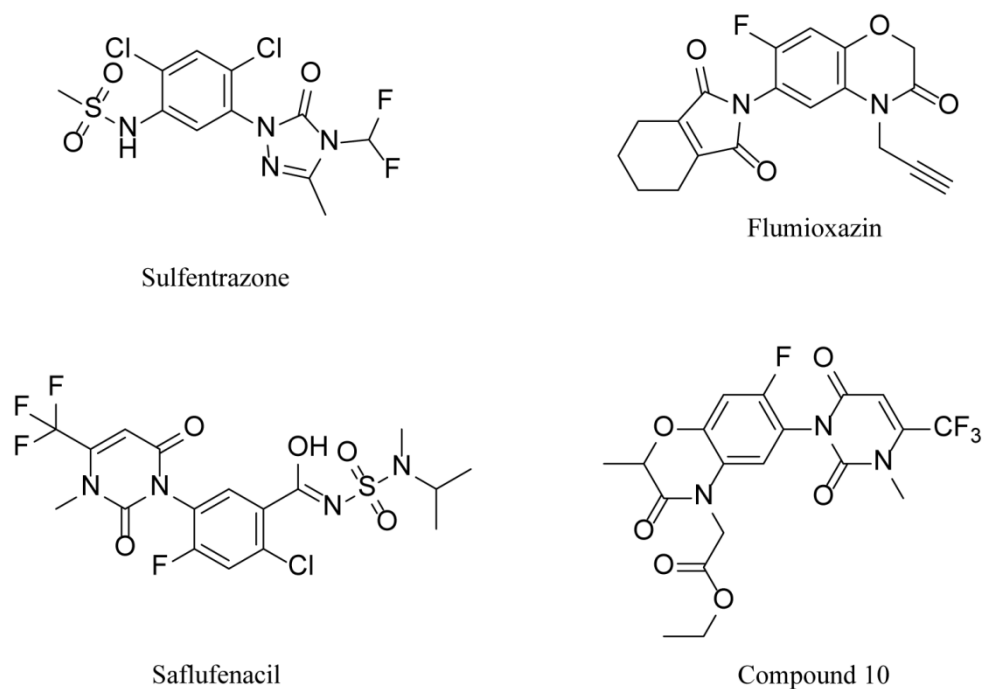

Figure S1. The structure of commercialized PPO inhibitors and Compound 10

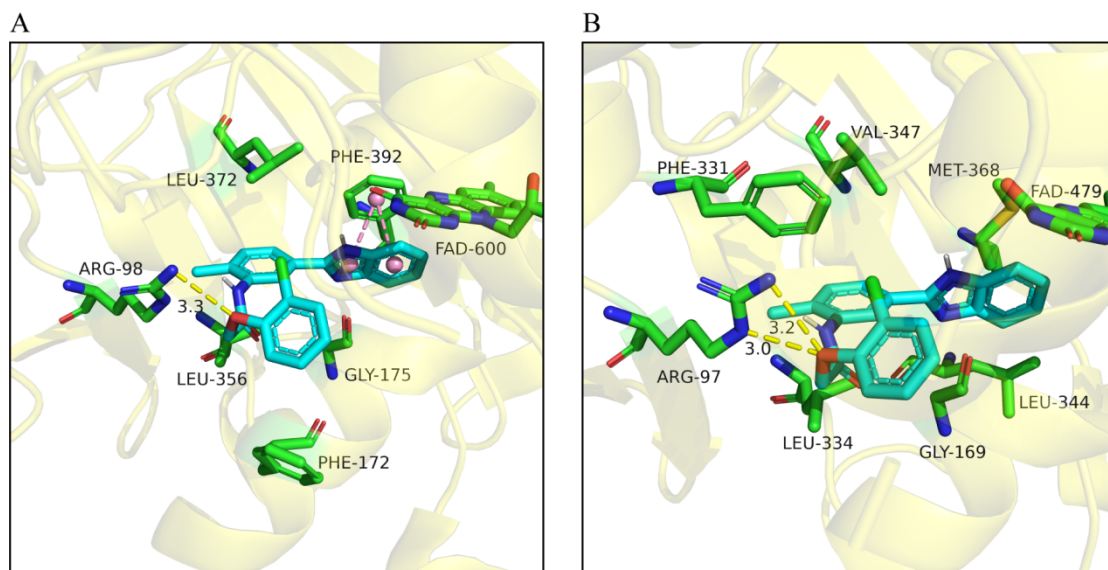

Figure S2. The binding modes of ZINC1150585 with ntPPO (A) and hPPO (C)

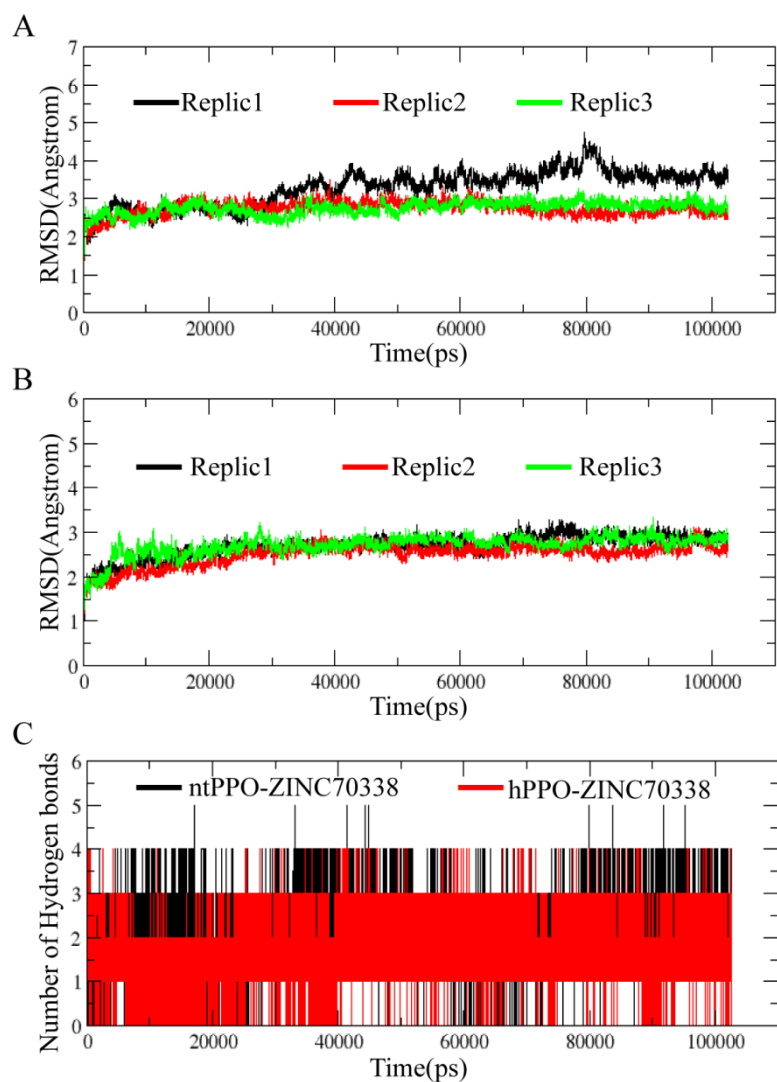

Figure S3. Root-mean-square deviations (RMSDs) of complexes of three replicas: A:ntPPO-ZINC70338; B:hPPO-ZINC70338; C: Inter molecular hydrogen bond numbers of protein-ligand complex.

Table S1. The virtual screening and molecular docking grid details (Docking Software, proteins, center points, grid size, and amino acid residues) of PPO.

| Docking Software          | Protein | Cavity                       | Center Points |       |       | Grid size (Å) |    |    | Molecular grid amino acid residues                                                        |
|---------------------------|---------|------------------------------|---------------|-------|-------|---------------|----|----|-------------------------------------------------------------------------------------------|
|                           |         |                              | X             | Y     | Z     | X             | Y  | Z  |                                                                                           |
| Autodock Vina/<br>Surflex | hPPO    | Active sites                 | -26.42        | 3.54  | 48.37 | 20            | 20 | 20 | ARG97、GLY169、VAL170、VAL314<br>PHE331、LEU334、LEU344、VAL347<br>MET368                       |
|                           |         | Substrate conduction channel | 25.93         | -2.39 | 57.34 | 20            | 20 | 20 | VAL146、ALA150、LEU154、VAL158<br>ALA159、ALA162、MET163、ASP164<br>LEU166、CYS167、PHE184、LEU187 |
|                           | ntPPO   | Active sites                 | -39.91        | -6.2  | 28.68 | 20            | 20 | 20 | ARG98、PHE172、GLY175、THR176<br>LEU334、PHE353、LEU356、LEU369<br>LEU372、PHE392                |
|                           |         | Substrate conduction channel | 44.08         | 3.76  | 42.46 | 20            | 20 | 20 | VAL152、SER153、PHE156、PHE160<br>LYS162、VAL164、VAL165、LEU168<br>ILE169、ASP170、PRO171、PHE190 |

Table S2. The physical characteristics of the other 11 selected compounds

| Compound     | MW     | HBD | HBA | ROB | HA | LogPo/w | TPSA  |
|--------------|--------|-----|-----|-----|----|---------|-------|
| ZINC649024   | 371.47 | 1   | 2   | 6   | 28 | 5.426   | 38.33 |
| ZINC2078708  | 415.87 | 0   | 4   | 6   | 30 | 5.735   | 56.26 |
| ZINC836537   | 438.27 | 1   | 4   | 8   | 28 | 4.086   | 72.47 |
| ZINC16023063 | 418.51 | 0   | 3   | 4   | 30 | 4.338   | 66.07 |
| ZINC4680768  | 381.44 | 1   | 2   | 5   | 29 | 6.053   | 29.10 |
| ZINC887010   | 415.51 | 1   | 4   | 7   | 30 | 5.196   | 89.41 |
| ZINC2079610  | 409.48 | 1   | 3   | 8   | 31 | 5.260   | 55.40 |
| ZINC6147185  | 398.45 | 2   | 4   | 8   | 28 | 3.498   | 83.65 |
| ZINC10311685 | 336.41 | 0   | 4   | 5   | 24 | 4.298   | 80.55 |
| ZINC686711   | 403.42 | 1   | 6   | 7   | 28 | 4.728   | 80.18 |
| ZINC1069729  | 420.89 | 2   | 3   | 5   | 30 | 3.811   | 83.63 |

Table S3. The average RMSD, RMSF, RoG, SASA of ZINC70338 binding with ntPPO and hPPO of three replicas

| Complexes       | Repeat times | RMSD (Å) | RMSF (Å) | RoG (Å) | SASA (Å <sup>2</sup> ) |
|-----------------|--------------|----------|----------|---------|------------------------|
| ntPPO-ZINC70338 | 1            | 3.28     | 7.17     | 23.53   | 20416.53               |
|                 | 2            | 2.74     |          | 23.77   | 20815.10               |
|                 | 3            | 2.75     |          | 23.63   | 20284.33               |
| hPPO-ZINC70338  | 1            | 2.70     | 8.88     | 22.62   | 21221.31               |
|                 | 2            | 2.51     |          | 22.69   | 21595.34               |
|                 | 3            | 2.71     |          | 22.67   | 21382.71               |

Table S4. The average values of each energy of binding free energy (kcal/mol)

| Complexes       | contributions           |                         |                        |                          |                        |                         | $\Delta G_{\text{bind}}$ |
|-----------------|-------------------------|-------------------------|------------------------|--------------------------|------------------------|-------------------------|--------------------------|
|                 | $\Delta E_{\text{vdw}}$ | $\Delta E_{\text{ele}}$ | $\Delta E_{\text{GB}}$ | $\Delta E_{\text{surf}}$ | $\Delta E_{\text{MM}}$ | $\Delta E_{\text{sol}}$ |                          |
| ntPPO-ZINC70338 | -49.52                  | -41.74                  | 47.12                  | -4.39                    | -91.26                 | 42.73                   | -48.53                   |
| hPPO-ZINC70338  | -45.84                  | -30.80                  | 42.87                  | -4.04                    | -76.64                 | 38.82                   | -37.82                   |

Table S5. The residue decomposition analysis of ntPPO-ZINC70338 (kcal/mol)

| Residue | Van der Waals | Polar | Non-Polar Solv | Total |
|---------|---------------|-------|----------------|-------|
| ARG 98  | -1.52         | -2.58 | -0.22          | -4.32 |
| PHE 172 | -1.42         | 0.00  | -0.18          | -1.59 |
| GLY 175 | -1.96         | -1.91 | -0.22          | -4.10 |
| THR 176 | -1.68         | 0.44  | -0.08          | -1.32 |
| LEU 334 | -0.74         | -0.05 | -0.04          | -0.84 |
| PHE 353 | -1.17         | 0.31  | -0.07          | -0.93 |
| VAL 355 | -0.51         | -0.15 | 0.00           | -0.67 |
| LEU 356 | -1.77         | 0.14  | -0.15          | -1.78 |
| THR 371 | -0.56         | 0.11  | -0.02          | -0.47 |
| LEU 372 | -1.60         | -0.52 | -0.10          | -2.21 |
| PHE 392 | -2.39         | -0.22 | -0.15          | -2.76 |
| FAD     | -1.82         | 0.73  | -0.14          | -1.23 |

Table S6. The residue decomposition analysis of hPPO-ZINC70338 (kcal/mol)

| Residue | Van der Waals | Polar | Non-Polar Solv | Total |
|---------|---------------|-------|----------------|-------|
| ARG 97  | -2.15         | -0.80 | -0.23          | -3.18 |
| LEU 166 | -0.87         | 0.10  | -0.10          | -0.86 |
| GLY 169 | -1.49         | -1.81 | -0.16          | -3.46 |
| VAL 170 | -1.80         | 0.51  | -0.13          | -1.42 |
| VAL 314 | -0.38         | 0.01  | -0.02          | -0.39 |
| PHE 331 | -1.72         | 0.20  | -0.14          | -1.66 |
| HIS 333 | -0.76         | -0.13 | -0.01          | -0.90 |
| LEU 334 | -1.90         | 0.09  | -0.15          | -1.95 |
| ILE 346 | -0.45         | -0.13 | 0.00           | -0.58 |
| VAL 347 | -0.89         | -0.48 | -0.06          | -1.43 |
| MET 368 | -1.35         | 0.15  | -0.12          | -1.32 |
| FAD     | -2.14         | 0.49  | -0.17          | -1.82 |
